# Supplementary material
Source: Springer Nature journal article supplement (https://www.springermedizin.de/resource/supplementary/12902_2013_190_MOESM2_ESM.pdf/9515726)
Supplement: MOESM2 [file 9515726]

**Appendix 2: Neuropathy: Analysis based on 5 year outcome of neuropathy as defined by DCCT group\***

**Patients with neuropathy at baseline were excluded from the analysis**

**Experimental arm**

| Primary and Secondary cohort |                                   | Neuropathy at 5 year follow-up |       | Total  |
|------------------------------|-----------------------------------|--------------------------------|-------|--------|
|                              |                                   | No                             | Yes   |        |
| Primary                      | Less than recommended             | 46                             | 2     | 48     |
|                              | LPA                               | 95.8%                          | 4.2%  | 100.0% |
|                              | Recommended and twice recommended | 62                             | 2     | 64     |
|                              | Above twice recommended           | 96.9%                          | 3.1%  | 100.0% |
| <hr/>                        |                                   |                                |       |        |
| Secondary                    | Less than recommended             | 133                            | 3     | 136    |
|                              | LPA                               | 97.8%                          | 2.2%  | 100.0% |
|                              | Recommended and twice recommended | 241                            | 7     | 248    |
|                              | Above twice recommended           | 97.2%                          | 2.8%  | 100.0% |
| <hr/>                        |                                   |                                |       |        |
| Total                        | Less than recommended             | 52                             | 6     | 58     |
|                              | LPA                               | 89.7%                          | 10.3% | 100.0% |
|                              | Recommended and twice recommended | 81                             | 7     | 88     |
|                              | Above twice recommended           | 92.0%                          | 8.0%  | 100.0% |
| <hr/>                        |                                   |                                |       |        |
| Total                        | Less than recommended             | 161                            | 8     | 169    |
|                              | LPA                               | 95.3%                          | 4.7%  | 100.0% |
|                              | Recommended and twice recommended | 294                            | 21    | 315    |
|                              | Above twice recommended           | 93.3%                          | 6.7%  | 100.0% |
| <hr/>                        |                                   |                                |       |        |
| Total                        | Less than recommended             | 98                             | 8     | 106    |
|                              | LPA                               | 92.5%                          | 7.5%  | 100.0% |
|                              | Recommended and twice recommended | 143                            | 9     | 152    |
|                              | Above twice recommended           | 94.1%                          | 5.9%  | 100.0% |
| <hr/>                        |                                   |                                |       |        |
| Total                        | Less than recommended             | 294                            | 11    | 305    |
|                              | LPA                               | 96.4%                          | 3.6%  | 100.0% |
|                              | Recommended and twice recommended | 535                            | 28    | 563    |
|                              | Above twice recommended           | 95.0%                          | 5.0%  | 100.0% |

**Chi-Square Tests**

| Primary and Secondary |                    | Value              | df | Asymp. Sig. (2-sided) |
|-----------------------|--------------------|--------------------|----|-----------------------|
| Primary               | Pearson Chi-Square | .526 <sup>a</sup>  | 2  | .769                  |
| Secondary             | Pearson Chi-Square | 2.510 <sup>b</sup> | 2  | .285                  |
| Total                 | Pearson Chi-Square | 2.980 <sup>c</sup> | 2  | .225                  |

**Control Arm**

| Primary and Secondary cohort |                                   | Neuropathy at 5 years |       | Total  |
|------------------------------|-----------------------------------|-----------------------|-------|--------|
|                              |                                   | No                    | Yes   |        |
| Primary                      | Less than recommended             | 52                    | 10    | 62     |
|                              | LPA                               | 83.9%                 | 16.1% | 100.0% |
|                              | Recommended and twice recommended | 63                    | 7     | 70     |
|                              | Above twice recommended           | 90.0%                 | 10.0% | 100.0% |
| <b>Total</b>                 |                                   | 148                   | 11    | 159    |
|                              |                                   | 93.1%                 | 6.9%  | 100.0% |
| <b>Total</b>                 |                                   | 263                   | 28    | 291    |
|                              |                                   | 90.4%                 | 9.6%  | 100.0% |
| Secondary                    | Less than recommended             | 45                    | 7     | 52     |
|                              | LPA                               | 86.5%                 | 13.5% | 100.0% |
|                              | Recommended and twice recommended | 78                    | 19    | 97     |
|                              | Above twice recommended           | 80.4%                 | 19.6% | 100.0% |
| <b>Total</b>                 |                                   | 132                   | 26    | 158    |
|                              |                                   | 83.5%                 | 16.5% | 100.0% |
| <b>Total</b>                 |                                   | 255                   | 52    | 307    |
|                              |                                   | 83.1%                 | 16.9% | 100.0% |
| Total                        | Less than recommended             | 97                    | 17    | 114    |
|                              | LPA                               | 85.1%                 | 14.9% | 100.0% |
|                              | Recommended and twice recommended | 141                   | 26    | 167    |
|                              | Above twice recommended           | 84.4%                 | 15.6% | 100.0% |
| <b>Total</b>                 |                                   | 280                   | 37    | 317    |
|                              |                                   | 88.3%                 | 11.7% | 100.0% |
| <b>Total</b>                 |                                   | 518                   | 80    | 598    |
|                              |                                   | 86.6%                 | 13.4% | 100.0% |

**Chi-Square Tests**

| Primary and Secondary |                    | Value              | df | Asymp. Sig. (2-sided) |
|-----------------------|--------------------|--------------------|----|-----------------------|
| Primary               | Pearson Chi-Square | 4.367 <sup>a</sup> | 2  | .113                  |
| Secondary             | Pearson Chi-Square | .957 <sup>b</sup>  | 2  | .620                  |
| Total                 | Pearson Chi-Square | 1.720 <sup>c</sup> | 2  | .423                  |
